1 **Title**

2 Adapting to extremes: reconstructing niche evolution in Australian *Acacia* over time and  
3 space.

4

5 Authors: Xia Hua<sup>1,2\*</sup>, Marcel Cardillo<sup>1</sup>, Lindell Bromham<sup>1</sup>

6

7 <sup>1</sup>Macroevolution and Macroecology, Research School of Biology, Australian National  
8 University, Canberra ACT 0200 Australia

9 <sup>2</sup>Mathematical Sciences Institute, Australian National University, Canberra ACT 0200  
10 Australia

11

12 **Abstract**

13 Macroevolutionary analysis is increasingly being used to study biodiversity responses to  
14 climate change, for example by using phylogenetic node ages to infer periods of  
15 diversification, or phylogenetic reconstruction of traits to infer adaptation to particular  
16 stresses. Here we apply a new macroevolutionary method to investigate the responses of a  
17 diverse plant genus, *Acacia*, to increasing aridity and salinity in Australia from the Miocene  
18 to the present. The Niche Evolution Model (NEMo) combines environmental niche  
19 modelling with phylogenetic comparative methods in a single statistical framework, to  
20 estimate current environmental tolerances, reconstruct the history of niche evolution and infer  
21 rates of change in key aspects of environmental tolerance. Using a large database of *Acacia*  
22 occurrence records and presence-absence survey sites, we find that both spatial and temporal  
23 patterns in niche evolution of *Acacia* are consistent with the aridification history of Australia  
24 and suggest high niche lability along both axes, which has allowed *Acacia* to quickly exploit  
25 new niches created during the aridification of the continent, and resulting in their current

26 dominance of many habitats across Australia. This study demonstrates that phylogenetic  
27 studies of niche evolution can move beyond application of simple trait-based models,  
28 allowing the underlying processes of speciation, adaptation and dispersal to be explicitly  
29 modelled in a macroecological and macroevolutionary context.

30

31 Keywords: aridity tolerance, salt tolerance, aridification, niche lability, Environmental Niche  
32 Modelling, Phylogenetic Comparative Methods.

33

### 34 **Introduction**

35 The climatic and environmental history of Australia during the Neogene and Quaternary  
36 Periods has been a story of increasing aridification. Dry climates may have existed from the  
37 Eocene (Carpenter et al 2014), but evidence from charcoal and pollen records reveals an  
38 increase in fire frequency and prevalence of fire-adapted, scleromorphic plant taxa, pointing  
39 to an expansion of the arid zone from the early Miocene onwards (Byrne et al 2008). As the  
40 arid zone expanded, previously widespread mesic forest habitats contracted to the coastal  
41 margins, and plant groups responded in different ways (Byrne & Murphy 2020, Crisp et al  
42 2004, Weston & Jordan 2017). Some groups (such as *Nothofagus*) remained confined to  
43 humid forest conditions and contracted with these habitats to small coastal refuges. Other  
44 groups responded to new ecological opportunities provided by the expanding arid zone, and  
45 diversified into numerous xeromorphic lineages. Some plant families, especially Proteaceae,  
46 Myrtaceae and Fabaceae, contain both mesic and xeromorphic lineages. Even some large  
47 genera, such as *Acacia*, *Grevillea* and *Hakea*, have both mesic and xeromorphic  
48 representatives. Plant groups such as these, in which close relatives occupy a range of  
49 ecoclimatic conditions, provide good case studies for studying the evolution of tolerance to  
50 extreme environmental conditions.

51           The expansion of the arid zone in Australia led to increasingly challenging  
52 environments characterized by stressful conditions for plant growth, including extreme  
53 drought, low soil fertility, frequent fires and high soil salinity. At the same time, areas that  
54 are extreme for most plants represent an opportunity for lineages to specialize, escape  
55 competition, and diversify. Arid-adapted lineages evolved a range of strategies to cope with  
56 water stress, broadly classified into escape, avoidance, and tolerance (Delzon 2015). We see  
57 all three strategies in *Acacia*, such as phyllode shedding (escape), scleromorphic structures  
58 like sunken stomata or needle-shaped phyllodes (avoidance), and physiological adaptations  
59 such as low leaf water potential (tolerance: Moore 2013). The wide range of mechanisms  
60 adopted by *Acacia* species to cope with water stress are reflected in their geographic  
61 distributions and varied climatic niches.

62           To understand how opportunities provided by the drying environments shaped  
63 present-day distribution and diversity, we need to examine the dynamics of lineage  
64 adaptation and diversification in response to extreme conditions. Macroevolutionary and  
65 macroecological analyses based on phylogenies have provided a variety of ways of  
66 investigating adaptation to harsh environments (Bromham et al. 2020). For example, the ages  
67 of nodes in molecular phylogenies have been used to infer bursts of diversification associated  
68 with periods of drying in *Acacia* (Renner et al. 2020), and the movement of rainforest-  
69 adapted lineages into dry environments (Crayn et al. 2006). In addition to relative timing of  
70 diversification, phylogenies can provide information on evolution of specific adaptations to  
71 extreme conditions. For example, Crisp et al. (2011) inferred the phylogenetic history of  
72 traits such as post-fire epicormic resprouting to investigate the timing of adaptation of  
73 *Eucalyptus* to increasing fire frequency. Jordan et al. (2008) reconstructed the evolution of  
74 stomatal protection structures (which are adaptations to dry climates) in Proteaceae to show  
75 that such structures evolved relatively few times in the ancestors of dry-climate clades. As

76 well as physiological and morphological traits, phylogenetic approaches have been applied to  
77 reconstructing the evolution of environmental niches. For example, by comparing alternative  
78 evolutionary models of climatic niche evolution for clades from different regions, Skeels and  
79 Cardillo (2017) showed that within four large genera (*Protea*, *Moraea*, *Banksia*, and *Hakea*),  
80 different lineages are evolving towards different climatic optima in different bioclimatic  
81 regions. Onstein et al. (2016) used the same approach to show that Proteaceae lineages in  
82 open vegetation and closed forest also have different inferred climatic optima.

83         Phylogenetic analyses such as these are useful, but have a number of limitations. To  
84 permit the application of standard stochastic models of trait evolution, such as Brownian  
85 Motion (BM) or Ornstein-Uhlenbeck (OU), in most macroevolutionary studies, the  
86 environmental niche is simplified to a point-estimate for a species, for example by taking the  
87 mean value across a species distribution (Evans et al 2009; Kozak & Wiens 2010;  
88 Münkemüller et al 2015; Renner et al 2020). But this is problematic for two main reasons.  
89 First, it averages away most of the potentially informative variation in environmental  
90 conditions across the range of a species. Second, models of trait evolution such as BM may  
91 not be appropriate for modelling the evolution of environmental tolerance. In particular,  
92 applying trait-evolution models to current environmental data to infer ancestral niches (e.g.,  
93 Renner et al 2020, Skeels & Cardillo 2017) assumes that environmental traits such as aridity  
94 or temperature evolve randomly and independently along branches for each lineage. This  
95 assumption may often be violated because environmental niche evolution is likely to be  
96 driven by climatic changes, which most likely apply simultaneously and directionally across  
97 all lineages within a given region.

98         More fundamentally, phylogenetic analyses of niche evolution with changing climate  
99 compartmentalise the inference of contemporary niche (inferred from occurrence data) and  
100 the history of niche evolution (inferred from phylogenetic models). These are treated as two

101 separate problems, and subject to independent analyses with separate statistical frameworks.  
102 But contemporary niches are the product of macroevolutionary processes and inferring these  
103 processes requires accurate inference of the niche from contemporary distributions, so the  
104 two are fundamentally linked. The logical step, then, is to link their analyses too.

105         Here, we infer the history of adaptation to extreme environments by applying a novel  
106 method, the Niche Evolution Model (NEMo), that combines Environmental Niche Modelling  
107 (ENM) and reconstruction of niche evolution in a single statistical framework. This method  
108 uses occurrence records to characterise the distribution of each tip species in a phylogeny,  
109 and reconstructs niche evolution by explicitly modelling key driving processes: (1) shift in  
110 areas of tolerable conditions, (2) adaptation of lineages to changing conditions, (3) dispersal  
111 away from areas that are no longer suitable and into accessible areas of suitable habitat, (4)  
112 speciation, and (5) divergence along lineages' environmental tolerances. A strength of this  
113 method is that it allows us to infer the placement of these key processes on the phylogeny and  
114 to reconstruct ancestral niches at any time point, without making the unrealistic assumption  
115 that niches evolve under a simple stochastic trait-based model. Unlike previous approaches,  
116 NEMo can infer the occurrence density of these processes of niche evolution on the  
117 phylogeny, so it allows us to directly compare the timing of niche shift to periods of climatic  
118 change, or compare the timing of niche evolution along different environmental axes, using  
119 standard statistical tests, without pre-defining the covariance structure to account for  
120 phylogenetic nonindependence. Information on paleoclimate can either be incorporated into  
121 the model as prior information, or can be held aside as independent information against  
122 which to test the robustness of the inference.

123         We use NEMo to investigate macroevolutionary responses of the Australian plant  
124 genus *Acacia* to aridification. *Acacia* is one of the largest and most widely-distributed plant  
125 genera in Australia, with over 900 described species occupying nearly all major habitat types,

126 often as dominant taxa. Many *Acacia* species are known to be tolerant of a range of extreme  
127 environmental conditions, and several previous studies have used *Acacia* species as case  
128 studies for understanding tolerance to extremes, including salinity and other aspects of soil  
129 geochemistry (Bui et al. 2014a, 2014b), and water stress (Atkin et al. 2002). There has been  
130 rapid progress in understanding the evolutionary history of *Acacia* in recent years (Maslin et  
131 al. 2003; Murphy et al. 2010; Mishler et al. 2014). Nearly all *Acacia* species are conspicuous,  
132 woody plants, so spatial occurrence records for *Acacia* are abundant and widespread. We  
133 combine a curated database of *Acacia* occurrence records with extensive survey data, along  
134 with predictors of sampling bias, to characterise the current distribution of species in the  
135 phylogeny. We use NEMo to reconstruct the evolution of adaptation to increasing  
136 aridification in Australian *Acacia*, focusing on niche evolution in response to increased  
137 aridity and changes in the distribution and severity of soil salinity (frequently associated with  
138 aridification (Gilkes et al. 2003). Specifically, we ask two questions. First, have periods of  
139 rapid niche evolution along the aridity and salinity axes corresponded with major periods of  
140 aridification in Australia? Second, on which lineages did adaptation to increased aridity and  
141 salinity occur? Answering these two questions may help us understand whether *Acacia*  
142 responded to continental aridification by a burst of adaptation, allowing the genus to radiate  
143 through the arid zone.

144

## 145 **Methods**

### 146 ***1. Phylogenetic and Spatial Data***

147 We based our analysis on a published phylogeny of 508 *Acacia* species, representing half of  
148 species currently recognized (Mishler et al. 2014). We timescaled branch lengths under a  
149 relaxed clock model using the R package ape (Paradis and Schliep 2018), with the root date

150 constrained between 21 and 23.9 million years ago (the estimated range of crown divergence  
151 dates (Miller et al. 2013).

152 To describe the current environmental conditions under which each species is found,  
153 we used a published dataset of 132,295 carefully checked presence locations of these 508  
154 *Acacia* species, filtered from a total of 750,000 *Acacia* records from the Australian Virtual  
155 Herbarium (Misher et al. 2014). We also assembled species presence-absence data from  
156 floristic survey databases for New South Wales (BioNet Systematic Flora Survey;  
157 [environment.nsw.gov.au/research/VISplot.htm](http://environment.nsw.gov.au/research/VISplot.htm)), Victoria (Victorian Biodiversity Atlas flora  
158 records; [environment.vic.gov.au/biodiversity/victorian-biodiversity-atlas](http://environment.vic.gov.au/biodiversity/victorian-biodiversity-atlas)), and Western  
159 Australia (Flora Surveys of the Yilgarn; [naturemap.dbca.wa.gov.au](http://naturemap.dbca.wa.gov.au)). We only included data  
160 from complete floristic surveys conducted later than 2005 (to ensure consistency in  
161 taxonomy) under government custodianship (to ensure consistent standards of survey  
162 quality). As a result, our presence-absence survey data included 27,850 survey sites across  
163 three states of Australia. Survey data are particularly valuable because they represent  
164 presence/absence data, not just opportunistic presence records, and are not subject to the  
165 same sampling biases as atlas or herbarium occurrence records. These presence-absence data  
166 were analysed together with the presence locations. To represent degree of aridity and  
167 salinity at each presence location for each species and each survey site, we used information  
168 from the geographic layer of maximum monthly aridity index (Williams et al. 2012) and the  
169 geographic layer of root zone soil electrical conductivity (Bui et al. 2017).

170 The majority of occurrence records for most species are presence-only records,  
171 typically collected opportunistically, so their spatial distributions tend to be biased towards  
172 regions that are more easily accessible to researchers, especially along road networks, and  
173 areas of particular interest, such as protected areas or hotspots of diversity (Fithian et al.  
174 2015; Haque et al. 2017). To correct for this sampling bias, we included two additional

175 factors: distance to the nearest road (using data from [www.ga.gov.au/geoscience/national](http://www.ga.gov.au/geoscience/national))  
176 and whether it is in a protected area, such as a conservation reserve or national park (from  
177 [www.environment.gov.au/land/nrs/science/capad](http://www.environment.gov.au/land/nrs/science/capad)).

178

## 179 ***2. Niche evolution model***

180 The Niche Evolution Model (NEMo) uses a Bayesian framework that includes three major  
181 components: model of niche evolution, phylogenetic comparative method (PCM), and  
182 ecological niche model (ENM). NEMo models species distributions in niche space, not  
183 geographic space. The aim is to infer not only species' niches at the contemporary tips of the  
184 phylogeny, but also to estimate the amount of change in niches along every branch of the  
185 phylogeny. This method has been shown to be effective at reconstructing past periods of  
186 niche evolution and better than standard ENMs at predicting aspects of contemporary niches  
187 (see Hua et al. submitted for details, available on bioRxiv).

188         The niche evolution component calculates how three aspects of niche (fundamental,  
189 available, realized) change under three basic processes (speciation, adaptation, dispersal).  
190 “Fundamental niche” represents the range of conditions that each species can tolerate at a  
191 given point in time, expressed as a range of values along a relevant environmental axis. We  
192 expect species to evolve along this environmental axis over evolutionary time, through the  
193 processes of adaptation to new conditions (by selecting for individuals at the extreme values  
194 of the distribution) and through speciation along environmental gradients (so that a species  
195 splits along its tolerance range leaving one daughter species that is more skewed toward the  
196 extreme conditions). “Available niche” describes the range of conditions in areas that are  
197 accessible to the species, regardless of whether the species can persist in those conditions.  
198 The potential of the species to occupy the available niche is governed by its fundamental  
199 niche and dispersal ability. We also include barriers to dispersal as nuisance parameters,



200 which could represent physical or biotic barriers. “Realized niche” consists of the locations  
201 where a species is found, which is shaped by the suitability of conditions and the opportunity  
202 to disperse to and occupy those areas.

203 The PCM part of the model infers the locations on the phylogeny of adaptation and  
204 speciation events, assuming these events are distributed along the branches of the phylogeny  
205 according to a Poisson process. Dispersal in niche space is modelled as a continuous process  
206 between any two events (adaptation or speciation), or nodes of the phylogeny. The  
207 distribution of these events on the phylogeny gives a possible history of niche evolution.  
208 Given this history, we use the model of niche evolution to calculate the three aspects of niche  
209 of each tip species. The ENM component of the method then assesses the fit of the inferred  
210 niches to the presence and/or absence locations of the tip species. The fit of the inferred  
211 niches to the data then feeds back to our inferences of the history of niche evolution and the  
212 niches of tip species. Details of the method, and description of tests of its performance and  
213 reliability, are given in Hua et al. (submitted), and the code with step-by-step instructions for  
214 implementing the model can be found at  
215 <https://github.com/huaxia1985/NEMo>. Below we briefly describe the parameters of the  
216 model applied to this case study.

217

### 218 ***3. Model Parameters***

219 NEMo has two universal parameters which are assumed to be constant across the phylogeny:  
220 adaptation rate and dispersal rate. Additional parameters that are specific to each adaptation,  
221 speciation, and dispersal events are: 1) amount of environmental change in an adaptation  
222 event, 2) proportion of a tolerance range that is inherited by one descendent species (its sister  
223 species inherits the other part) from the ancestral species in a speciation event, 3) where a  
224 dispersal barrier locates along the environmental axis during a dispersal process.

225 We apply separate NEMo analyses to the evolution of environmental niches in *Acacia*  
226 along aridity and along salinity. For each of these niche axes, the values for the available  
227 niche and the fundamental niche at the root of the phylogeny were assumed to follow normal  
228 distributions. The starting values for their means and standard deviations were set to their  
229 maximum likelihood estimates given the likelihood of each tip species' presence-only data  
230 and presence-absence data, assuming that no events of niche evolution occurred on the  
231 phylogeny. The starting values for adaptation rate and dispersal rate were arbitrarily set to  
232 0.03 and 1, respectively. Dispersal rate had rather flat prior, an exponential distribution with  
233 rate of 0.1. The parameters for the niches at the root and the adaptation rate had relatively  
234 narrow priors, a lognormal distribution with logarithmic mean of their initial values and  
235 logarithmic standard deviation of 0.5. The narrow priors for the root niches were used to  
236 ensure that root niches do not exceed observed maximum and minimum values (Williams et  
237 al. 2012; Bui et al. 2017) too often during MCMCs. The narrow prior for adaptation rate was  
238 used to ensure a finite likelihood value, as parameters of the fundamental niche change  
239 proportionally to adaptation rate on a log scale, so there is a narrow range of adaptation rate  
240 that gives finite likelihood values. The starting value for the occurrence rate of adaptation  
241 events and the occurrence rate of speciation events was arbitrarily set to 0.1. A narrow prior  
242 was applied on both occurrence rates, an exponential distribution with rate of 10 to reduce the  
243 degree of overestimation on the number of events (see Hua et al. submitted). For both aridity  
244 and salinity, we ran 20 independent MCMCs for  $1 \times 10^6$  generations, with a thinning interval  
245 of 1000 and the first 600,000 generations discarded as burnin.

246

#### 247 ***4. Accounting for sampling bias***

248 We used an inhomogeneous Poisson point process (Renner et al. 2015) as the ENM  
249 component of NEMo. Because opportunistic sampling bias can influence the niche estimation

250 (Fithian et al. 2015), we modified the likelihood function to account for sampling bias, using  
251 the method of Fithian et al. (2015). The log-likelihood of the presence-only data of each tip  
252 species is modified as,

$$253 \quad \ell_P = \sum_{i \in I_{PO}} [\log(\lambda_{r_i}) + \delta z_i] - \frac{\mathcal{D}}{N} \sum_{i \in I_{BG}} \lambda_{f_i} \lambda_{a_i} e^{\delta z_i}$$

254 , where  $z_i$  are values of the factors that influence sampling effort at the  $i^{\text{th}}$  location and  $\delta$  are  
255 the coefficients of the two sampling factors we included - distance of the location to the  
256 nearest road and whether the location is in a protected area - which are assumed to have the  
257 same value for all tip species. The starting values of coefficients were set to their maximum  
258 likelihood estimates given the likelihood function, and a rather flat prior was used: an  
259 exponential distribution with rate of 0.1. In the second term of the equation,  $\lambda_f$  is the inferred  
260 fundamental niche of a tip species, giving the proportion of individuals of the species that can  
261 tolerate a certain level of aridity and salinity, and  $\lambda_a$  is the inferred available niche of the tip  
262 species, giving the proportion of areas accessible to the species that have certain level of  
263 aridity and salinity. If we were not accounting for sampling bias, the second term of the  
264 equation would be a direct integral of  $\lambda_f \lambda_a$  (Hua et al. submitted), but because each location  
265 now has a specific value for sampling bias, we can only approximate the integral by  
266 randomly sampling  $N$  locations from the surroundings of the species presence locations to  
267 construct a set of background locations  $I_{BG}$  and averaging the term to integrate over all the  
268 background locations. Note that these background locations are only used to numerically  
269 approximate the second term of the equation, so they are not pseudo-absence locations  
270 (Fithian et al. 2015).

271 For each *Acacia* species, background locations were sampled uniformly from areas  
272 within an arbitrary large radius (20 km) of each presence location of the species, so the  
273 weight of each background location is  $\frac{\mathcal{D}}{N}$ , where  $\mathcal{D}$  is the total area that falls within the 20 km

274 radius of each species presence location, and  $N$  is the total number of background locations,  
275 which was ten times the number of the species presence locations, with a minimum of 1000  
276 for species with few presence locations. Based on the environmental conditions over all the  
277 background locations, we used Sturges' formula (Sturges 1926) to decide the bin size to  
278 discretise the aridity index and the electrical conductivity.

279

## 280 ***5. Estimating rate and amount of niche evolution***

281 The amount of niche evolution per branch is calculated as the sum of the differences in the  
282 mean of the realized niche before and after each event (both adaptation and speciation events)  
283 inferred along each branch of the phylogeny over the posterior samples, calculating both the  
284 net amount (positive or negative) and the absolute amount. The net amount of niche evolution  
285 divided by branch length gives the direction of niche evolution, and the absolute amount of  
286 niche evolution divided by branch length gives the rate of niche evolution. Last, we  
287 calculated the intensity of the inferred environmental change during adaptation events at each  
288 time point over the whole phylogeny and compared the distribution of this intensity over time  
289 to the aridification history of Australia (see details in Hua et al. submitted).

290

## 291 **Results**

### 292 ***1. Spatial Patterns of Niche Evolution***

293 The *Acacia* phylogeny is characterized by a mixture of large, young clades (recent, rapid  
294 divergences), and smaller, older clades (longer-persisting lineages: Figure 1). Three recent  
295 radiations, each around 1 Ma old, include most present-day species in Northern Australia,  
296 Southern Australia, and Eastern Australia. Of these, the Northern Australian clade has the  
297 highest average rate of niche evolution on both aridity and salinity axes (Figure 1). The  
298 smaller, older clades are mainly in Western Australia, with many extant species originating

299 earlier than the three large radiations. These smaller older clades have, on average, much  
300 lower rate of niche evolution on both aridity and salinity axes than the recent radiations  
301 (Figure 1). Present-day species that occupy regions that are arid and prone to high salinity  
302 (deserts and Mediterranean ecosystems) are found throughout the phylogeny, forming small  
303 clusters of related species. In contrast, present-day species that occupy the mesic zone are  
304 found mainly in young clades as large clusters of closely-related species.

305

306 The net amount of niche evolution inferred by NEMo along the phylogeny is shown in Figure  
307 1. Most of the evolutionary change on both aridity and salinity axes has been pushing species  
308 towards tolerance of the extreme conditions. We can see this in the patterns of niche  
309 evolution along the aridity axis in different habitat types (Figure 2A). The largest changes in  
310 niche are in lineages currently found in the most arid environments, while little or no niche  
311 shift is in lineages currently distributed in forests. The same pattern is repeated over the  
312 whole phylogeny, and also within each of the recent radiations (Figure 2A). Similarly, on the  
313 salinity axis, NEMo inferred the greatest amount of niche evolution towards higher salinity  
314 leading to species currently distributed in the Mediterranean ecosystems (Figure 2B). The  
315 same pattern is inferred in the three recent radiations, where there is little change along the  
316 salinity axis in lineages currently distributed in forests (Figure 2B).

317

## 318 ***2. Temporal Patterns of Niche Evolution***

319 On the aridity axis, the inferred intensity of environmental change during each adaptation  
320 event peaks at 13 Ma and near the present (after 2.5 Ma), corresponding to major drying  
321 periods of Australia (Figure 3). On the salinity axis, the inferred intensity of environmental  
322 change during each adaptation event peaks near the present (after 2.5 Ma), with two  
323 additional lower peaks around 10 Ma and 17 Ma (Figure 3).

324           Across the phylogeny, the net amount of inferred niche evolution due to both  
325 adaptation and speciation events along the salinity and aridity axes showed a significant  
326 positive correlation (Figure 4; Kendall's rank correlation coefficient=0.25,  $p<0.001$ ).  
327 Although significant, the correlation is mostly driven by niche evolution along the terminal  
328 branches, and there is a great deal of scatter, with relatively more aridity evolution on tip  
329 branches leading to present-day species found in the arid zone (Deserts & Xeric Shrublands),  
330 and relatively more salinity evolution on tip branches leading to present-day species found in  
331 Mediterranean ecosystems. The greater amounts of aridity and salinity evolution along the tip  
332 branches are not due to longer branch length, as NEMo also infers large amount of aridity  
333 and salinity evolution along very short tip branches (Figure 4).

334

### 335 **Discussion**

336 Aridification has been the prevailing environmental trend across most of the Australian  
337 continent through the Neogene and Quaternary. In order to understand the history underlying  
338 Australia's current plant diversity, we need effective methods for reconstructing the  
339 evolutionary responses of plant clades to the environmental changes brought about by  
340 aridification. In this study, we use the large, widespread genus *Acacia* as a case study to  
341 reconstruct its history of niche evolution along aridity and salinity axes, using the newly  
342 developed method NEMo. We reconstruct both spatial and temporal patterns in niche  
343 evolution of *Acacia* and show (1) a preponderance of evolutionary change in niches towards  
344 more extreme values of aridity and salinity, (2) a concentration of niche evolution in the  
345 ancestors of species currently found in arid and Mediterranean regions in both the old clades  
346 and the recent radiations, (3) peaks in niche evolution throughout the aridification history of  
347 Australia, (4) correlated evolution of aridity and salinity tolerance, particularly along tip  
348 branches. As we explain below, these results are consistent with the adaptation of *Acacia*

349 lineages to drier climates, allowing them to exploit new niches opening up through the  
350 aridification of the continent. Our results point to an evolutionary flexibility in *Acacia* that is  
351 likely to have played a key role in their current near-ubiquitous distribution and dominance of  
352 many habitats across Australia.

353         The preponderance of niche evolution towards more extreme values of both aridity  
354 and salinity suggests that aridification has been a dominant driver of *Acacia* evolution and  
355 diversification across Australia during the Neogene & Quaternary. The concentration of  
356 niche evolution on branches leading to species currently found in more arid and salt-affected  
357 regions, in both old and recent clades, suggests that the recent radiations of *Acacia* were not  
358 triggered by adaptation to aridity and salinity. Instead, extant species occupying arid and salt-  
359 affected regions are likely to have evolved from ancestral lineages in mesic areas which do  
360 not show high rates of niche evolution along these axes. This interpretation indicates  
361 evolutionary flexibility in *Acacia*, which is supported by the high rate of niche evolution  
362 along both aridity and salinity axes in the three recent radiations. This enhanced rate of niche  
363 evolution was also found by a recent study of diversification in *Acacia* using traditional  
364 PCMs, which hypothesized that Pleistocene glacial-interglacial climate cycling (< 2.5Ma)  
365 drove rapid climatic adaptation, which promoted diversification and led to large radiations  
366 (Renner et al. 2020).

367         Unlike traditional PCMs, NEMo is able to identify key events of niche evolution  
368 along the *Acacia* phylogeny. We found that most changes in niche along the aridity axis were  
369 in the recent radiations, predominantly after 1Ma and along tip branches. But niche evolution  
370 in aridity was also inferred along two branches ancestral to all these radiations (marked with  
371 asterisk in Figure 1), between 12 to 15 Ma and around 5Ma (Figure 1). It is likely that the  
372 niche evolution events that occurred along the two ancestral branches left descendant  
373 lineages of *Acacia* able to tolerate higher aridity than the other lineages in Tropical and

374 Temperate forests and grasslands during the Pleistocene, so that *Acacia* was able to replace  
375 many other groups during the drying period of the Pleistocene. These two pulses of niche  
376 evolution along the aridity axis are also consistent with the aridification history of Australia.  
377 *Acacia* emerged during a period of aridification (28-23Ma), and we found peaks of  
378 adaptation to increasing aridity in *Acacia* during the two subsequent drying periods, 14-5Ma  
379 and after 5Ma (Byrne et al. 2008).

380 Comparing salt tolerance to aridity tolerance in *Acacia*, we found that the amount of  
381 niche evolution along aridity and salinity axes was highly correlated across branches of the  
382 *Acacia* phylogeny. This result is consistent with the observation that saline soils are  
383 frequently associated with aridity, so many species are adapted to both aridity and salinity  
384 (Gong et al. 2017). Correlated evolution was also suggested between salinity and alkalinity  
385 tolerance in *Acacia* using phylogenetic independent contrasts (Bui et al. 2014b). The NEMo  
386 method offers a way to account for phylogenetic nonindependence in testing correlated  
387 evolution, without making *a priori* assumptions about the phylogenetic covariance matrix. In  
388 addition, the NEMo method allows us to detect branches that have large amounts of niche  
389 evolution along both aridity and salinity axes. These branches are mostly terminal branches  
390 scattered across the *Acacia* phylogeny and are mostly ancestral to species currently  
391 distributed in areas with both high aridity and high salinity. This result is consistent with high  
392 niche lability along both aridity and salinity in Australian *Acacia*, as suggested by the high  
393 rate of niche evolution in the three radiations.

394 Inferred peaks of increased salinity are on recent lineages, which is consistent with  
395 previous findings of a phylogenetically “tippy” distribution of salt tolerant species in grasses  
396 (Bennett et al. 2013; Moray et al. 2015). Consequently, even if salt tolerance has evolved  
397 many times through old adaptation events, these events rarely gave rise to persistently salt  
398 tolerant lineages of large clades of related salt tolerant taxa, leaving less phylogenetic signal



399 for us to reconstruct adaptation events in the deep part of the phylogeny than adaptation  
400 events near the tip of the phylogeny (Bromham 2016). The high niche lability in Australian  
401 *Acacia* further agrees with previous hypothesis that the tippy distribution of salt tolerant  
402 species is due to high niche lability (Bromham et al. 2016).

403       It is important to note that for the NEMo analysis, as for most macroevolutionary  
404 analyses, we have assumed that the phylogeny has accurate topology and provides an  
405 approximate scaling of evolutionary events in time. Clearly, phylogenetic estimates of either  
406 topology or the timing of evolutionary events are not error-free (Bromham et al. 2018;  
407 Guindon 2020; Nie et al. 2019). In particular, uncertainty or bias in branch length estimates  
408 arising from imperfect characterisation of molecular rates over time may have a non-trivial  
409 impact on macroevolutionary inference (Duchêne et al. 2017). Phylogenies such as this one  
410 where the only calibration is a root date may be particularly vulnerable to errors in position of  
411 node heights in some parts of the tree (Duchêne et al. 2014). One possible solution is to apply  
412 the NEMo analysis on posterior samples of phylogenies, but perhaps a better advance will be  
413 to embed the NEMo method into phylogenetic reconstruction, which allows us to directly  
414 link niche evolution events to diversification events (Hua et al. submitted). Another issue  
415 with our current inference of niche evolution in *Acacia* is incomplete sampling, as the *Acacia*  
416 phylogeny only includes half of the known extant species. One obvious solution is to sample  
417 more species, but another way to increase the amount of information in the analysis of niche  
418 evolution is to incorporate historical data, such as paleoclimate, as priors for the occurrence  
419 density of niche evolution events, to supplement current species distribution data (Hua et al.  
420 submitted). Here we have used only part of the available information in the inference process  
421 in order to demonstrate the utility of the method (so we can compare our inferred  
422 evolutionary history to known paleoclimatic history), but the method allows for all available  
423 information to contribute to stronger inference.

424

425 **References**

426 Atkin O., Schortemeyer M., McFarlane N., Evans J.R. 2002. Variation in the components of  
427 relative growth rate in 10 *Acacia* species from contrasting environments. *Plant Cell*  
428 *Environ.* 21:1007–1017.

429 Bennett T.H., Flowers T.J., Bromham L. 2013. Repeated evolution of salt-tolerance in  
430 grasses. *Biol. Lett.* 9:20130029.

431 Bromham L. 2016. Testing hypotheses in macroevolution. *Stud. Hist. Philos. Sci. A* 55:47–  
432 59.

433 Bromham L., Hua X., Cardillo M. 2016. Detecting macroevolutionary self-destruction from  
434 phylogenies. *Syst. Biol.* 65:109–127.

435 Bromham L., Duchêne S., Hua X., Ritchie A., Duchêne D., Ho S. 2018. Bayesian molecular  
436 dating: opening up the black box. *Biol. Rev.* 93:1165–1191.

437 Bromham L., Hua X., Cardillo M. 2020. Macroevolutionary and macroecological approaches  
438 to understanding the evolution of stress tolerance in plants. *Plant Cell Environ.* 43:1–  
439 15.

440 Byrne M., Yeates D.K., Joseph L., Kearney M., Bowler J., Williams M.A., Cooper S.,  
441 Donnellan S.C., Keogh J.S., Leys R., Melville J., Murphy D.J., Porch N., Wyrwoll  
442 K.H. 2008. Birth of a biome: insights into the assembly and maintenance of the  
443 Australian arid zone biota. *Mol. Ecol.* 17:4398–4417.

444 Byrne M., Murphy D.J. 2020. The origins and evolutionary history of xerophytic vegetation  
445 in Australia. *Aust. J. Bot.* 68:195–207.

446 Bui E.N., González-Orozco C.E., Miller J.T. 2014a. *Acacia*, climate, and geochemistry in  
447 Australia. *Plant and Soil* 281:161–175.

- 448 Bui E.N., Thornhill A., Miller J.T. 2014b. Salt- and alkaline-tolerance are linked in *Acacia*.  
449 Biol. Lett. 10:20140278.
- 450 Bui E.N., Wilford J., de Caritat P. 2017. Predictive spatial modelling for mapping soil salinity  
451 at continental scale, EGU General Assembly, Vienna, Austria. doi:  
452 10.13140/RG.2.2.25552.20483.
- 453 Carpenter R.J., McLoughlin S., Hill R.S., McNamara K.J., Jordan G.J. 2014. Early evidence  
454 of xeromorphy in angiosperms: stomatal encryption in a new eocene species of  
455 *Banksia* (Proteaceae) from Western Australia. Am. J. Bot. 101:1486–1497.
- 456 Crayn D.M., Rossetto M., Maynard D.J. 2006. Molecular phylogeny and dating reveals an  
457 Oligo-Miocene radiation of dry-adapted shrubs (former Tremandraceae) from  
458 rainforest tree progenitors (Elaeocarpaceae) in Australia. Am. J. Bot. 93:1328–1342.
- 459 Crisp M., Cook L., Steane D.A. 2004. Radiation of the Australian flora: what can  
460 comparisons of molecular phylogenies across multiple taxa tell us about the evolution  
461 of diversity in present day communities? Philos. Trans. R. Soc. B 359:1551–1571.
- 462 Crisp M.D., Burrows G.E., Cook L.G., Thornhill A.H., Bowman D.M.J.S. 2011. Flammable  
463 biomes dominated by eucalypts originated at the Cretaceous–Palaeogene boundary.  
464 Nat. Commun. 2:193.
- 465 Delzon S. 2015. New insight into leaf drought tolerance. Funct. Ecol. 29:1247–1249.
- 466 Duchêne S., Lanfear R., Ho S.Y.W. 2014. The impact of calibration and clock-model choice  
467 on molecular estimates of divergence times. Mol. Phylogenetics Evol. 78:277–289.
- 468 Duchêne D.A., Hua X., Bromham L. 2017. Phylogenetic estimates of diversification rate are  
469 affected by molecular rate variation. Journal of Evolutionary Biology 30:1884–1897.
- 470 Evans M.E.K., Smith S.A., Flynn R.S., Donoghue M.J. 2009. Climate, niche evolution, and  
471 diversification of the “bird-cage” evening primroses (*Oenothera*, sections *Anogra* and  
472 *Kleinia*). Am. Nat. 173:225–240.

- 473 Fithian W., Elith J., Hastie T., Keith D.A. 2015. Bias correction in species distribution  
474 models: pooling survey and collection data for multiple species. *Methods Ecol. Evol.*  
475 6:424–438.
- 476 Gilkes B., Lee S., Singh B. 2003. The imprinting of aridity upon a lateritic landscape: an  
477 illustration from southwestern Australia. *C. R. Geosci.* 335:1207–1218.
- 478 Gong Y., Lv G., Guo Z., Chen Y., Cao J. 2017. Influence of aridity and salinity on plant  
479 nutrients scales up from species to community level in a desert ecosystem. *Sci. Rep.*  
480 7:6811.
- 481 Guindon S. 2020. Rates and Rocks: Strengths and Weaknesses of Molecular Dating Methods.  
482 *Front. Genet.* 11:526–526.
- 483 Haque M.M., Nipperess D.A., Gallagher R.V., Beaumont L.J. 2017. How well documented is  
484 Australia's flora? Understanding spatial bias in vouchered plant specimens. *Austral*  
485 *Ecol.* 42:690–699.
- 486 Hua X., Cardillo M., Bromham L. 2020. Tracking niche change through time: simultaneous  
487 inference of ecological niche evolution and estimation of contemporary niches.  
488 bioRxiv XXXXXXXXXXXX
- 489 Jordan G. J., Weston P.H., Carpenter R.J., Dillon R.A., Brodribb T.J. 2008. The evolutionary  
490 relations of sunken, covered, and encrypted stomata to dry habitats in Proteaceae. *Am.*  
491 *J. Bot.* 95:521–530.
- 492 Kozak K., Wiens J. 2010. Accelerated rates of climatic-niche evolution underlie rapid species  
493 diversification. *Ecol. Lett.* 13:1378–1389.
- 494 Maslin B.R., Miller J.T., Seigler D.S. 2003. Overview of the generic status of *Acacia*  
495 (Leguminosae: Mimosoideae). *Aust. Syst. Bot.* 16:1–18.

- 496 Miller J.T., Murphy, D.J., Brown G.K., Richardson D.M., González-Orozco C.E. 2011. The  
497 evolution and phylogenetic placement of invasive Australian *Acacia* species.  
498 Diversity Distrib. 17:848–860.
- 499 Miller J.T., Murphy D.J., Ho S.Y.W., Cantrill D.J., Seigler D. 2013. Comparative dating of  
500 *Acacia*: combining fossils and multiple phylogenies to infer ages of clades with poor  
501 fossil records. Aust. J. Bot. 61:436–445.
- 502 Mishler B.D., Knerr N., González-Orozco C.E., Thornhill A.H., Laffan S.W., Miller J.T.  
503 2014. Phylogenetic measures of biodiversity and neo- and paleo-endemism in  
504 Australian *Acacia*. Nat. Comm. 5:4473.
- 505 Moore G.M. 2013. Adaptations of Australian tree species relevant to water scarcity in the  
506 urban forest. Arboric. Urban. For. 39:109–115.
- 507 Moray C., Hua X., Bromham L. 2015. Salt tolerance is evolutionarily labile in a diverse set  
508 of angiosperm families. BMC Evol. Biol. 15:90.
- 509 Münkemüller, T., Boucher, F.C., Thuiller, W., & Lavergne, S. (2015). Phylogenetic niche  
510 conservatism – common pitfalls and ways forward. Funct. Ecol. 29:627–639.
- 511 Murphy D. J., Brown G. K., Miller J. T., Ladiges P. Y. 2010. Molecular phylogeny of *Acacia*  
512 Mill. (Mimosoideae: Leguminosae): evidence for major clades and informal  
513 classification. Taxon 59:7–19.
- 514 Nie Y., Foster C.S.P., Zhu T., Yao R., Duchêne D.A., Ho S.Y.W., Zhong B. 2019.  
515 Accounting for uncertainty in the evolutionary timescale of green plants through  
516 clock-partitioning and fossil calibration strategies. Syst. Biol. 69:1–16.
- 517 Onstein R.E., Jordan G.J., Sauquet H., Weston P.H., Bouchenak-Khelladi Y., Carpenter R.J.,  
518 Linder H.P. 2016. Evolutionary radiations of Proteaceae are triggered by the  
519 interaction between traits and climates in open habitats. Glob. Ecol. Biogeogr.  
520 25:1239–1251.

- 521 Owen C.L., Marshall D.C., Hill K.B.R., Simon C. 2017. How the aridification of Australia  
522 structured the biogeography and influenced the diversification of a large lineage of  
523 Australian cicadas. *Syst. Biol.* 66:569–589.
- 524 Paradis E., Schliep K. 2018. ape 5.0: an environment for modern phylogenetics and  
525 evolutionary analyses in R. *Bioinformatics*, bty633.
- 526 Renner I.W., Elith J., Baddeley A., Fithian W., Hastie T., Phillips S.J., Popovic G., Warton  
527 D.I. 2015. Point process models for presence-only analysis. *Methods Ecol. Evol.*  
528 6:366–379.
- 529 Renner M.A.M., Foster C.S.P., Miller J.T., Murphy D.J. 2020. Increased diversification rates  
530 are coupled with higher rates of climate space exploration in Australian *Acacia*  
531 (Mimosoideae). *New Phytol.* 226:609–622.
- 532 Skeels A., Cardillo M. 2017. Environmental niche conservatism explains the accumulation of  
533 species richness in Mediterranean-hotspot plant genera. *Evolution* 71: 582–594.
- 534 Sturges H.A. 1926. The choice of a class interval. *J. Am. Stat. Assoc.* 21:65–66.
- 535 Weston P.H., Jordan G.J. 2017. Evolutionary biogeography of the Australian flora in the  
536 Cenozoic era. In ‘Australian vegetation,’ 3rd edn. (Ed. DA Keith) pp. 40–62.  
537 (Cambridge University Press: Cambridge, UK)
- 538 Williams K.J., Belbin L., Austin M.P., Stein J.L., Ferrier S. 2012. Which environmental  
539 variables should I use in my biodiversity model? *Int. J. Geogr. Inf. Sci.* 26:2009–  
540 2047.
- 541
- 542

543 Figure 1. Phylogenetic distribution of the inferred amount of niche evolution along axes of  
544 aridity (left) and salinity (right). The blue to red color scale gives the sum of the amount of  
545 change in the mean of realized niche values before and after each niche evolution event  
546 inferred along each branch, averaged over posterior samples. Shifts towards less extreme  
547 conditions are in blue and shifts towards more extreme conditions are in red. The ecoregion  
548 map shows the current distribution of eight ecoregions in Australia. Each tip species has a  
549 stacked bar showing the relative proportion of its current presence locations in each  
550 ecoregion, in the same color scheme as the ecoregion map. We also include two additional  
551 maps. Left one shows the spatial variation in the aridity index in Australia, with lower values  
552 in more arid areas. Right one shows the variation in root zone soil electrical conductivity,  
553 with higher values in areas with higher salinity. The mean and the 95% range of estimated  
554 rate of niche evolution over all posterior samples are marked for each major clade in the  
555 phylogeny.

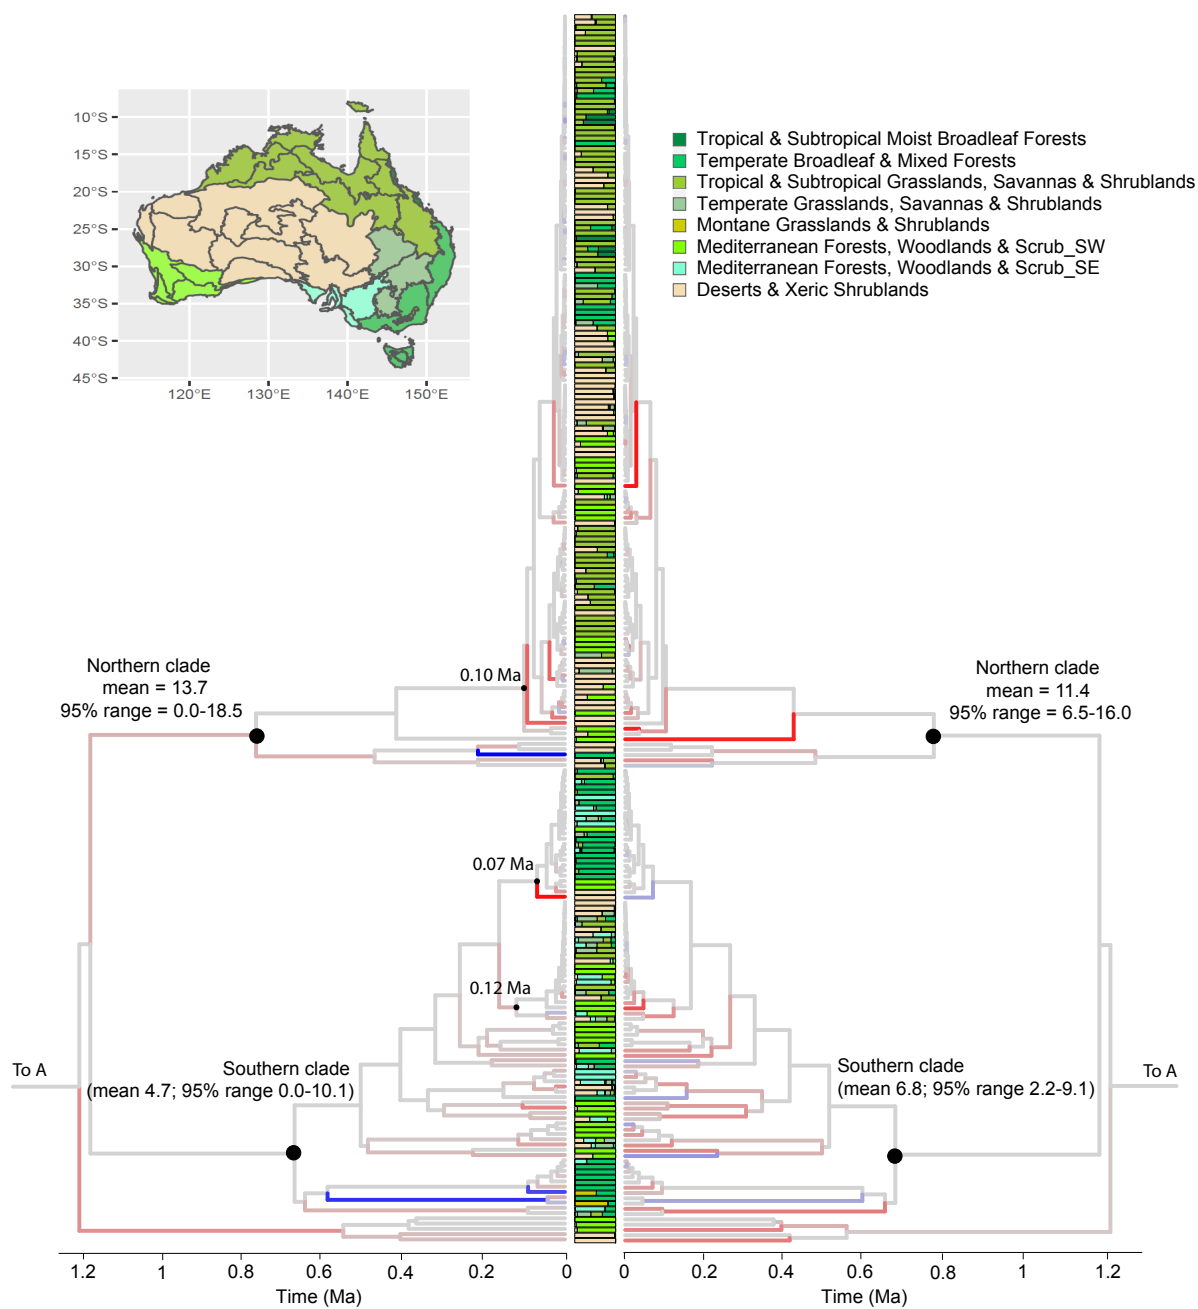

556

557



558 Figure 1 cont.

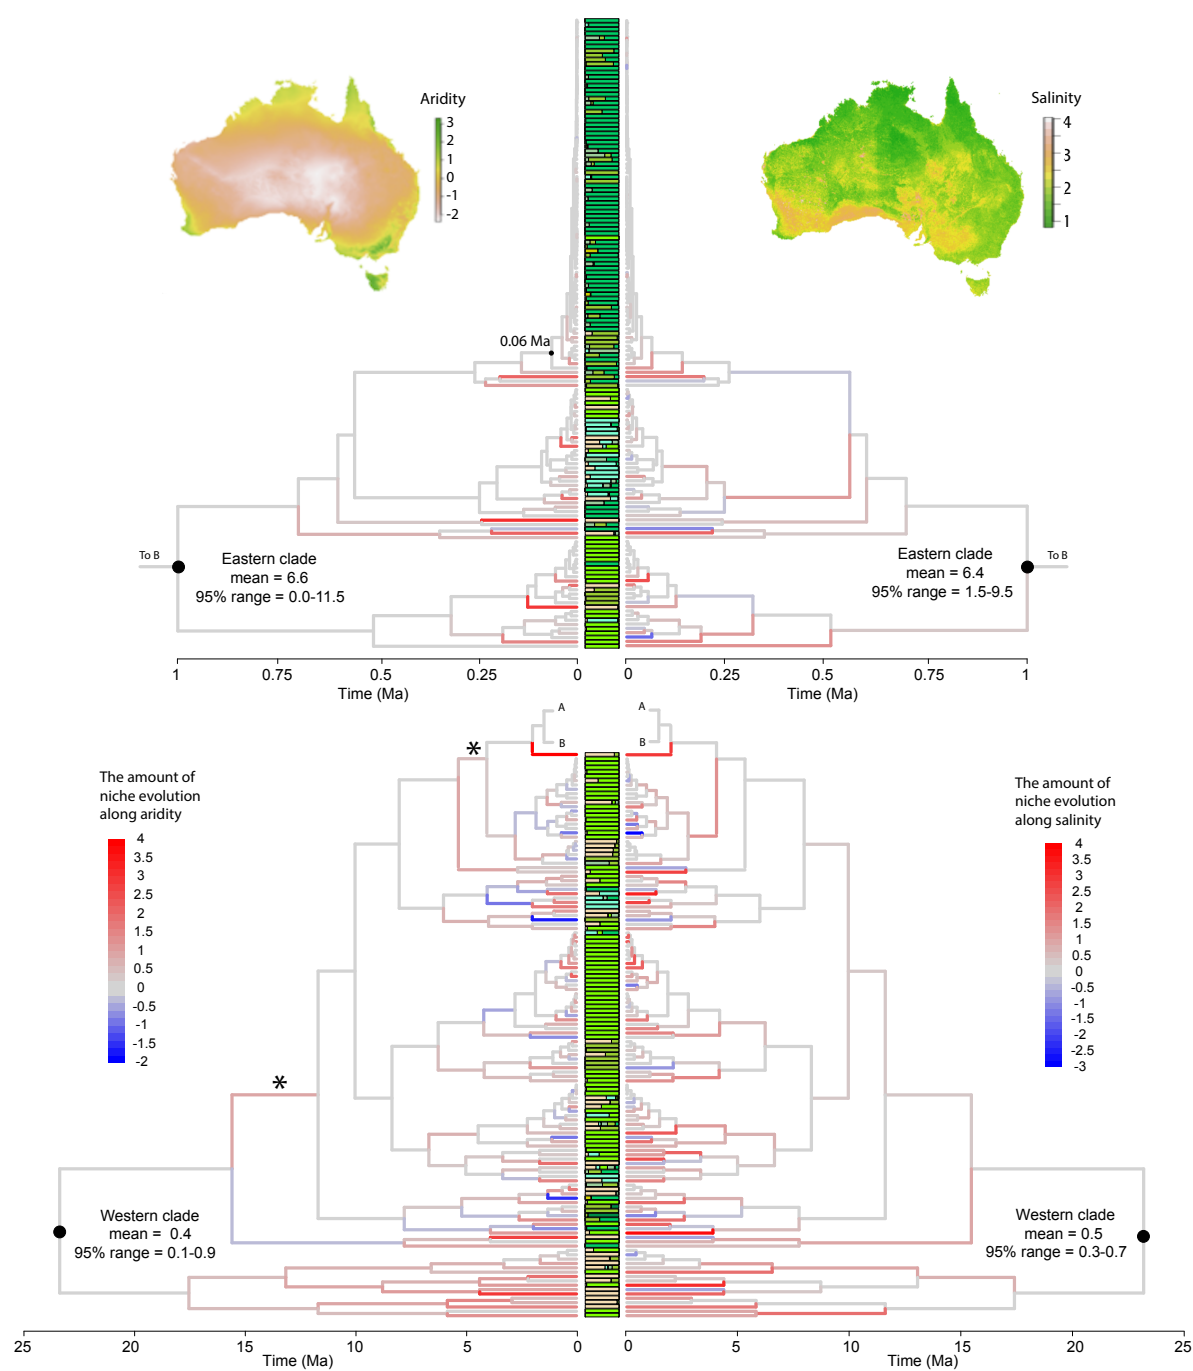

559

560

561 Figure 2. Boxplots of the net amount of niche evolution along aridity axis A) and salinity axis  
562 B). “All species” plots the sum of the amount of niche evolution along the branches that  
563 connect the root to each tip of the phylogeny. “Northern clade”, “Southern clade”, “Eastern  
564 clade” plot the sum of the amount of niche evolution along the branches that connect the  
565 MCRA of the three clades of recent radiation to each tip in these clades in Figure 1. Tips are  
566 grouped by the ecoregion that the majority of current presence location of the tip species fall  
567 in, using the same color scheme as the ecoregion map in Figure 1. T-test is used to first  
568 compare within vegetation types: desert, Mediterranean, grasslands, forests. If regions of the  
569 same vegetation type do not differ, then these regions are grouped and compared to other  
570 vegetation types. The statistical significance of a t-test between two bioregions linked by  
571 lines is shown above the corresponding horizontal line.

A) The amount of niche evolution along aridity axis

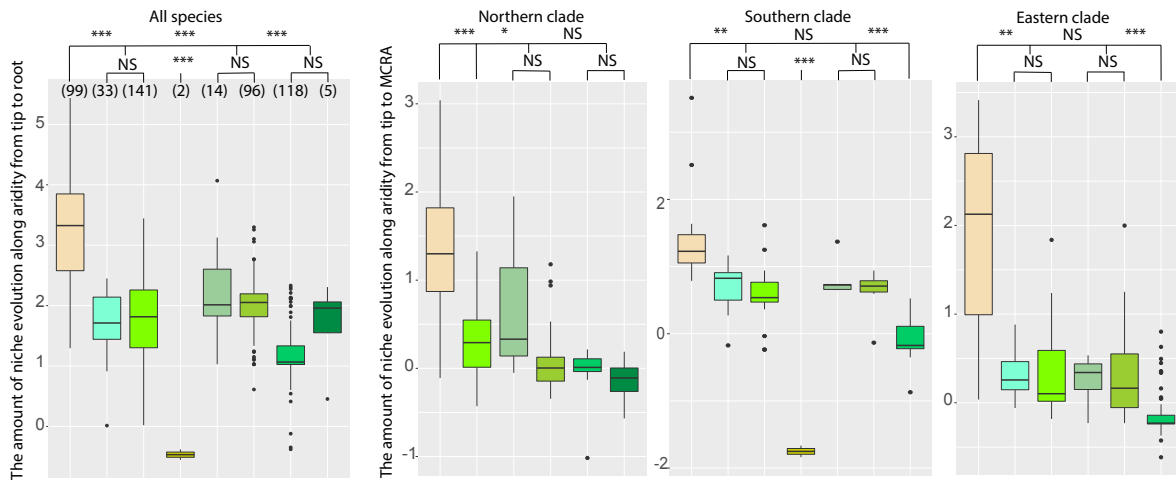

B) The amount of niche evolution along salinity axis

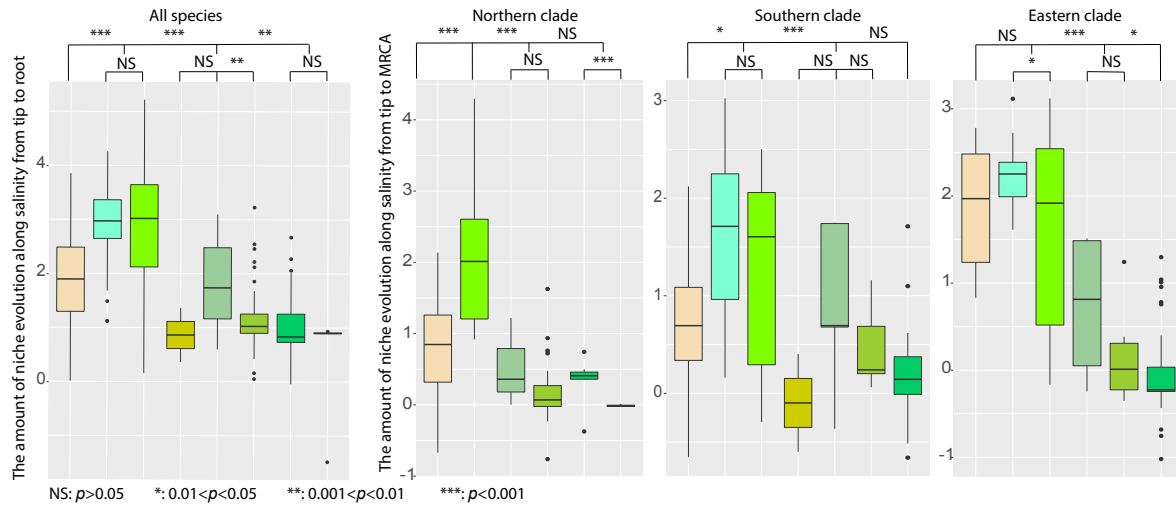

NS:  $p > 0.05$  \* :  $0.01 < p < 0.05$  \*\* :  $0.001 < p < 0.01$  \*\*\* :  $p < 0.001$

- Deserts & Xeric Shrublands
- Montane Grasslands & Shrublands
- Temperate Grasslands, Savannas & Shrublands
- Tropical & Subtropical Grasslands, Savannas & Shrublands
- Mediterranean Forests, Woodlands & Scrub\_SE
- Mediterranean Forests, Woodlands & Scrub\_SW
- Temperate Broadleaf & Mixed Forests
- Tropical & Subtropical Moist Broadleaf Forests

572

573

574 Figure 3. Histogram of the inferred dates of adaptation events in *Acacia* drought tolerance  
575 (solid) and salt tolerance (dashed).

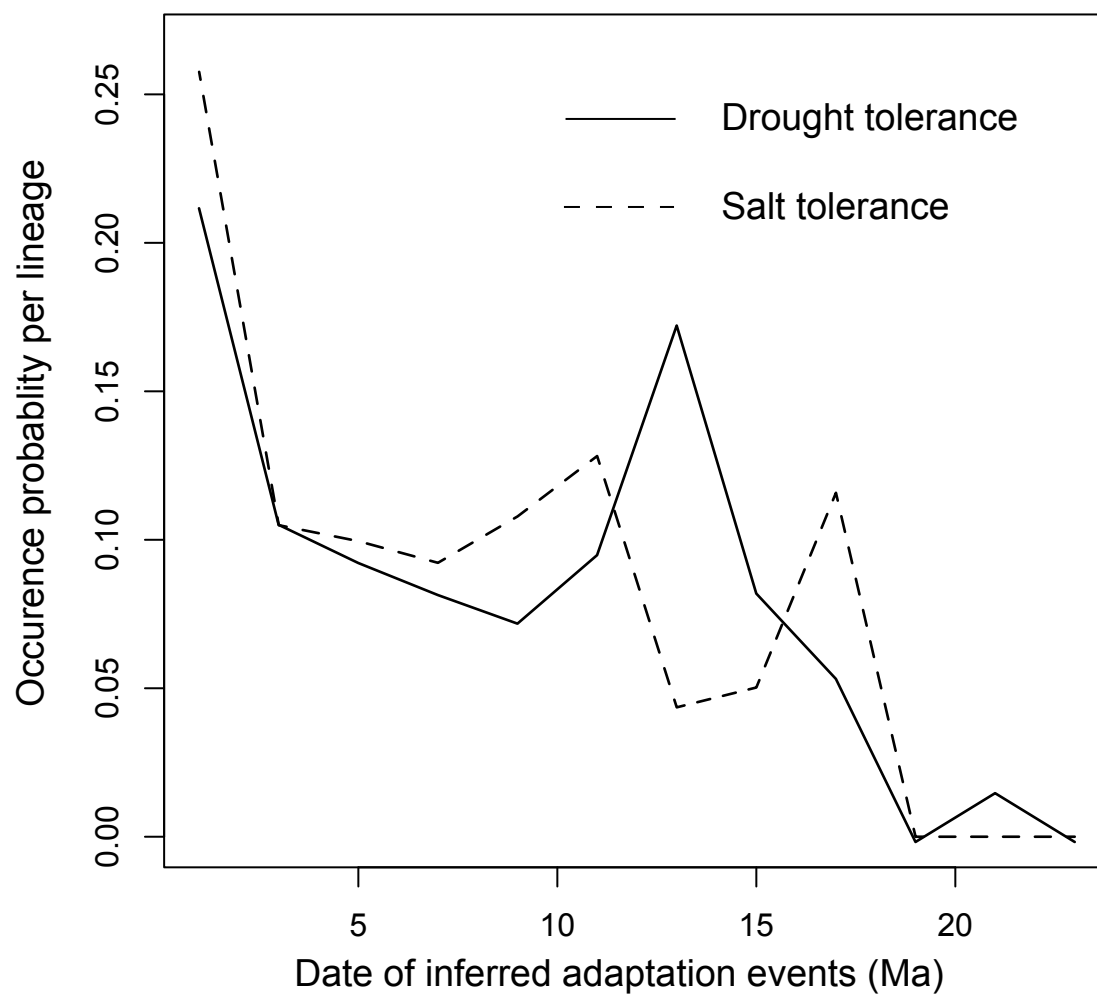

576

577 Figure 4. Correlation in the amount of niche evolution per branch along aridity and salinity.  
578 Each datapoint is a branch, with internal branches in black. The size of each datapoint is  
579 proportional to the tenth root of the branch length. Terminal branches are colored by the  
580 ecoregion that the majority of current presence location of the corresponding tip species fall  
581 in, using the same color scheme as the ecoregion map in Figure 1.

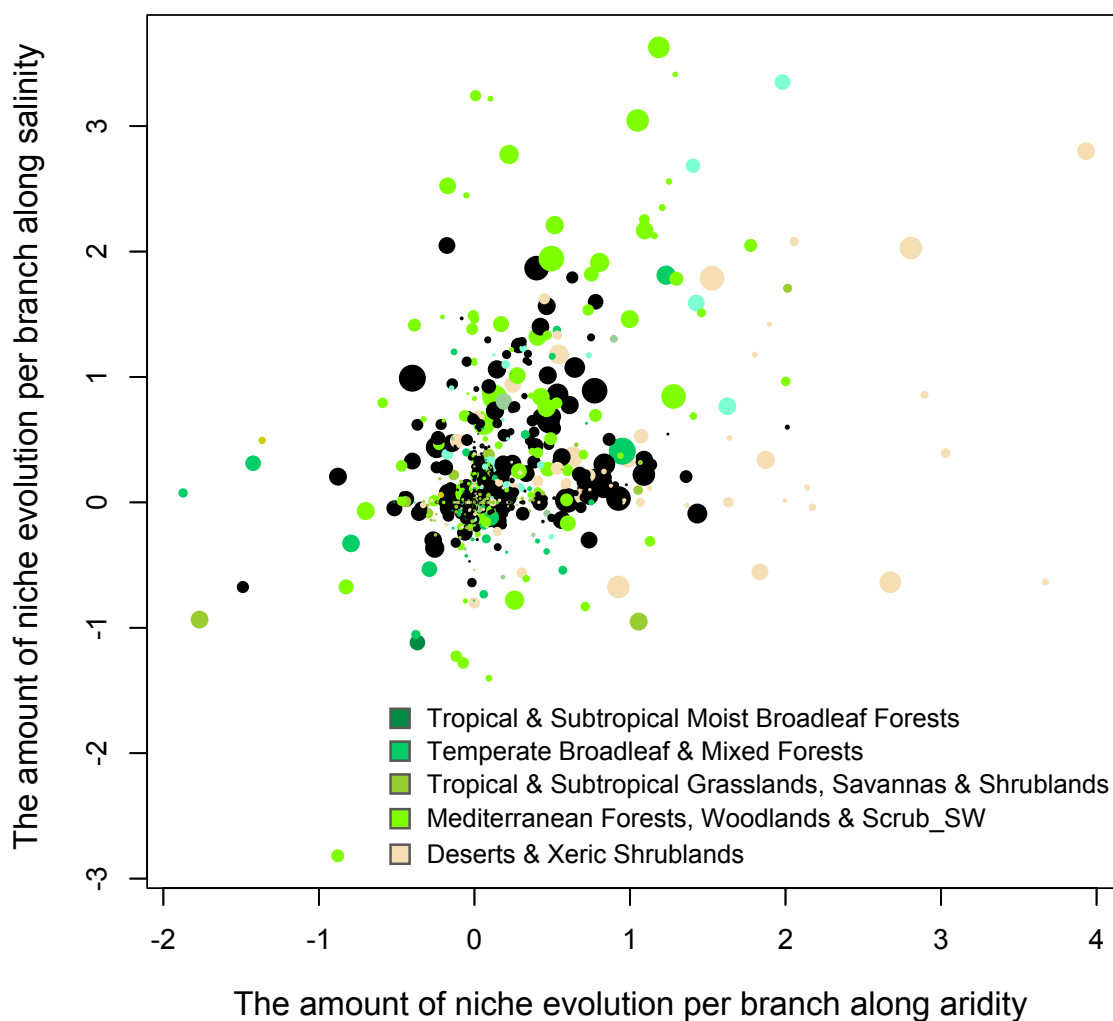

582
